# Supplementary material for: Cortico-subcortical β burst dynamics underlying movement cancellation in humans
Source: eLife journal article supplement (doi:10.7554/elife.70270), 2021-12-07

# BETA BURSTS IN STN AND THALAMUS BY HEMISPHERE

## A

Number of bursts  
in SSD-SSRT period

STN

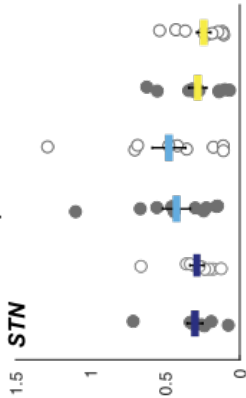

Ventral thalamus

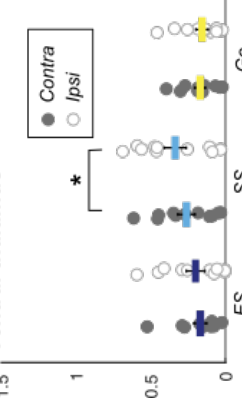

Dorsal thalamus

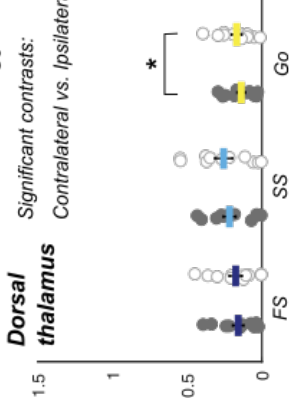

Significant contrasts:  
Contralateral vs. Ipsilateral:

## B

Subcortical beta burst rate, successful stops

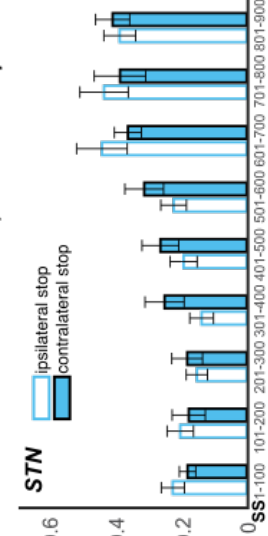

Ventral thalamus

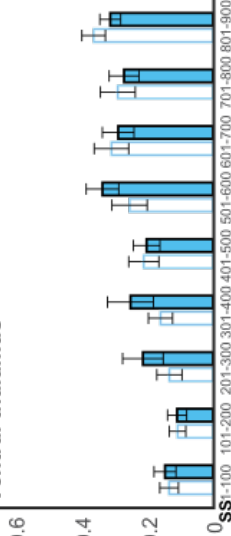

Dorsal thalamus

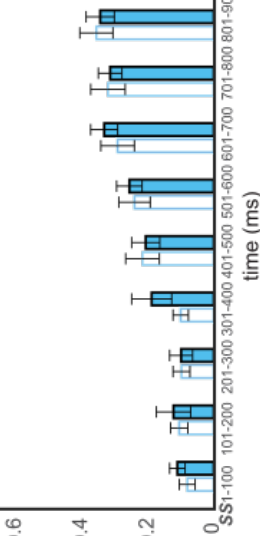

## B

Subcortical beta burst rate, failed stops

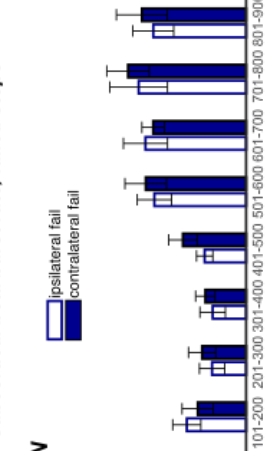

Ventral thalamus

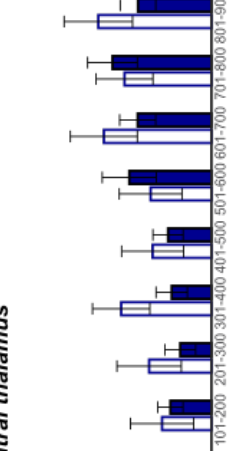

Dorsal thalamus

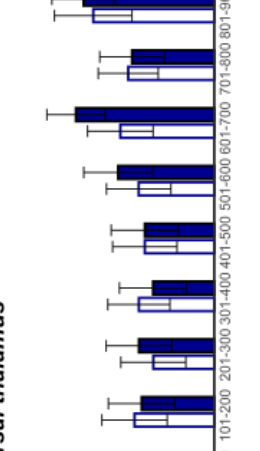

## B

Subcortical beta burst rate, matched gos

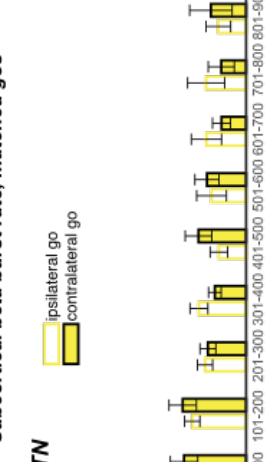

Ventral thalamus

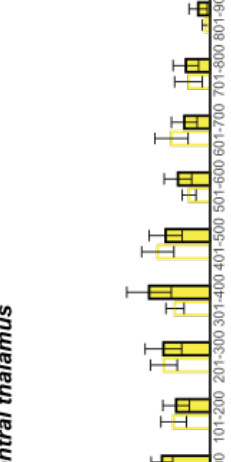

Dorsal thalamus

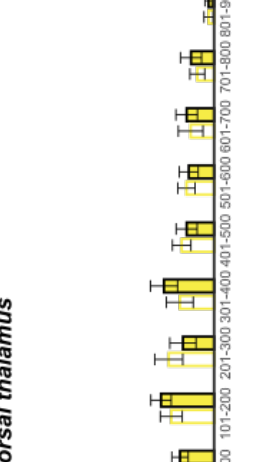

## C

SMC bursts locked to subcortical bursts, successful stops

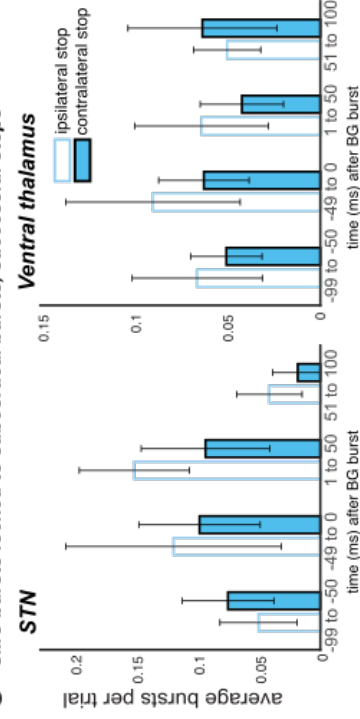

Dorsal thalamus

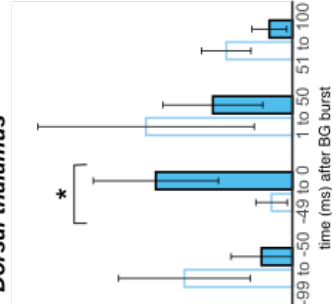

## C

SMC bursts locked to subcortical bursts, matched gos

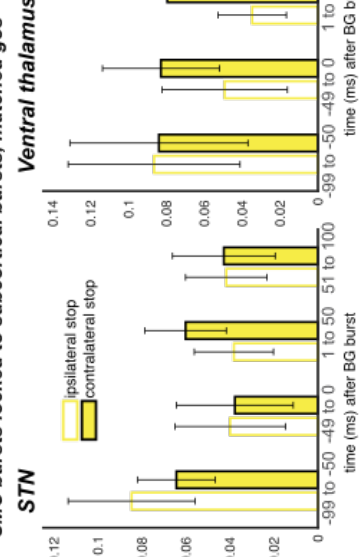

Ventral thalamus

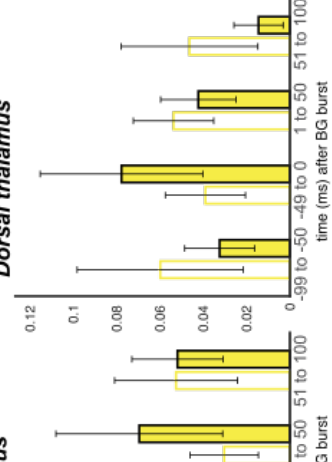

Dorsal thalamus

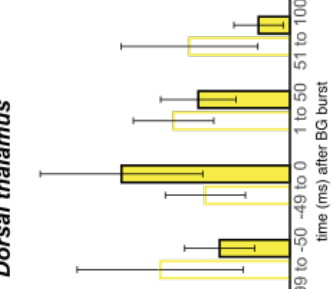

Supplement: supp [file elife_poa_e70270_Figure_3_figure_supplement_3.pdf › elife_poa_e70270_Figure_3_figure_supplement_3.pdf]
