# Supplementary material for: Cortico-subcortical β burst dynamics underlying movement cancellation in humans
Source: eLife journal article supplement (doi:10.7554/elife.70270), 2021-12-07

# BETA BURSTS IN VENTRAL AND DORSAL STN FOLLOWING STOP SIGNALS

## Ventral STN (contacts 0/1)

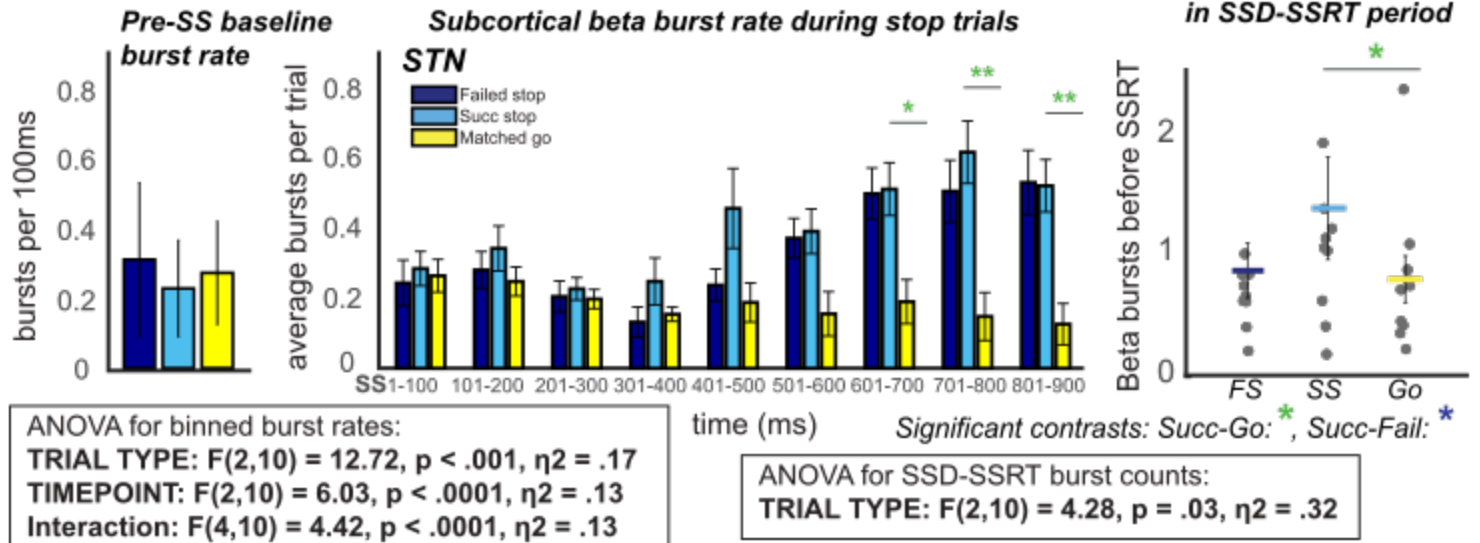

## Dorsal STN (contacts 2/3)

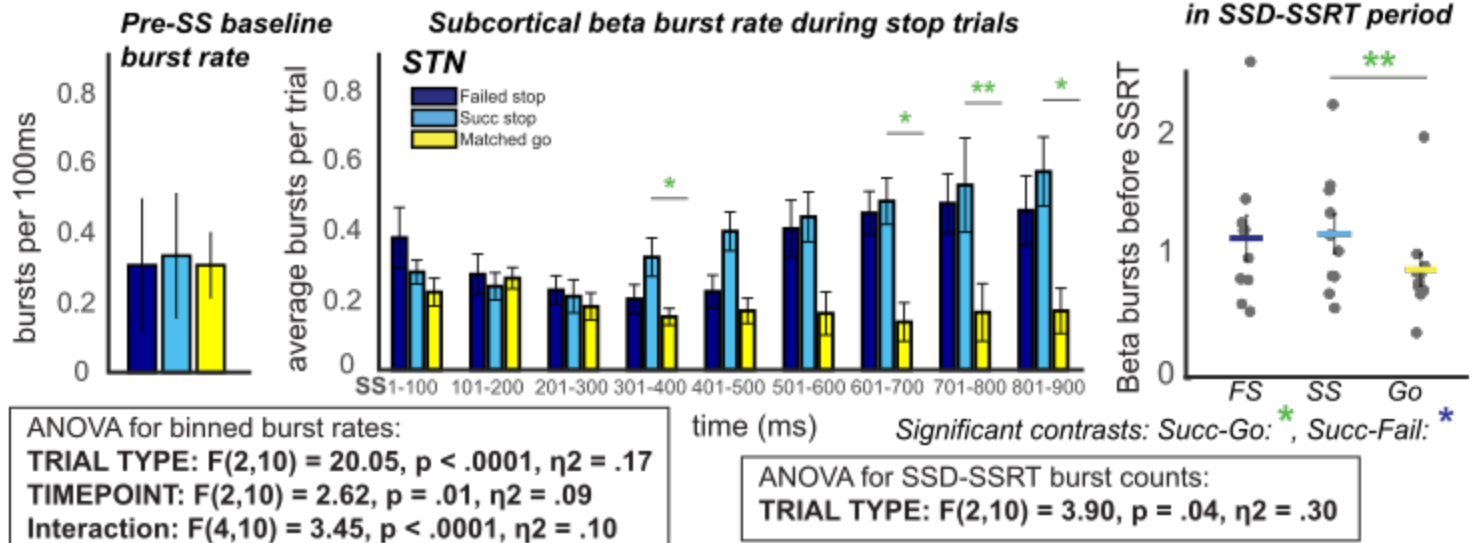

Supplement: supp [file elife_poa_e70270_Figure_3_figure_supplement_2.pdf › elife_poa_e70270_Figure_3_figure_supplement_2.pdf]
