# Supplementary material for: Cortico-subcortical β burst dynamics underlying movement cancellation in humans
Source: eLife journal article supplement (doi:10.7554/elife.70270), 2021-12-07
Supplement: supp [file elife_poa_e70270_Figure_4_figure_supplement_1.pdf › elife_poa_e70270_Figure_4_figure_supplement_1.pdf]

## RELATIONSHIP OF VENTRAL/DORSAL STN BURSTS TO SMC BURSTS

**SMC bursts, locked to ventral STN bursts**

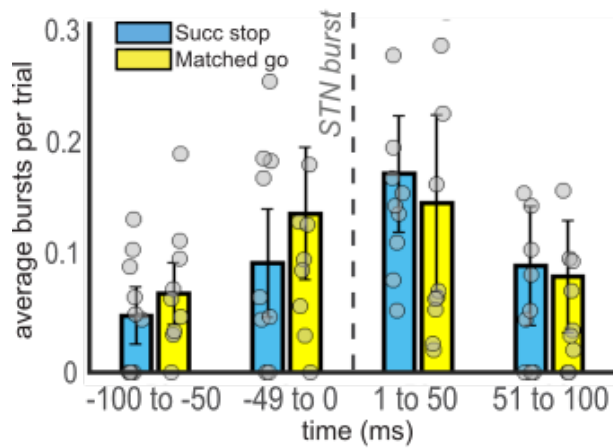

ANOVA for SMC locked to ventral STN bursts:  
 TRIAL TYPE:  $F(2,10) = 0.04$ ,  $p = .96$ ,  $\eta^2 < .001$   
 TIMEPOINT:  $F(2,10) = 2.01$ ,  $p = .14$ ,  $\eta^2 = .09$   
 Interaction:  $F(4,10) = 0.42$ ,  $p = .86$ ,  $\eta^2 = .02$

**Ventral STN bursts, locked to SMC bursts**

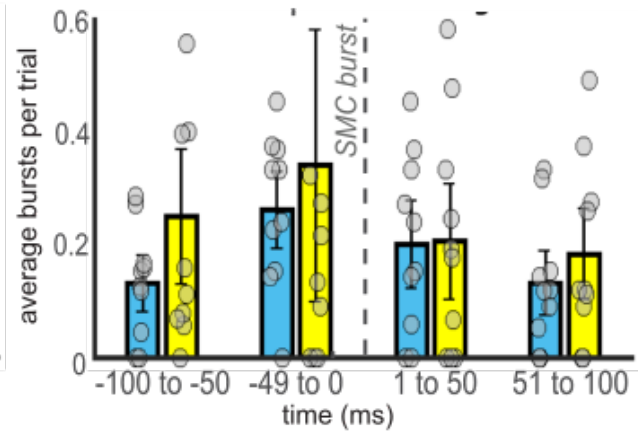

ANOVA for ventral STN locked to SMC bursts:  
 TRIAL TYPE:  $F(2,10) = 0.42$ ,  $p = .66$ ,  $\eta^2 = .01$   
 TIMEPOINT:  $F(2,10) = 2.38$ ,  $p = .09$ ,  $\eta^2 = .07$   
 Interaction:  $F(4,10) = 0.28$ ,  $p = .95$ ,  $\eta^2 = .01$

**SMC bursts, locked to dorsal STN bursts**

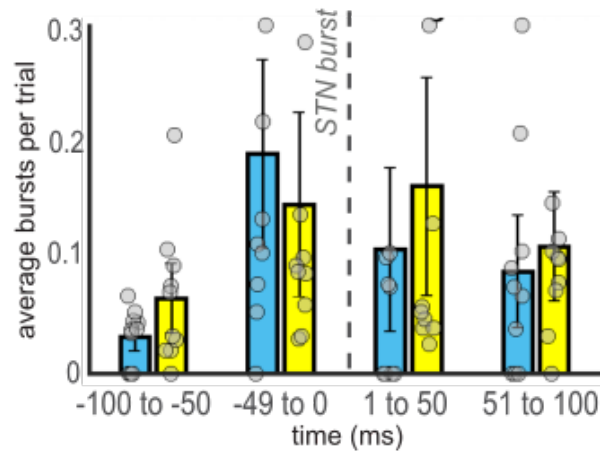

ANOVA for SMC locked to dorsal STN bursts:  
 TRIAL TYPE:  $F(2,10) = 0.35$ ,  $p = .71$ ,  $\eta^2 = .01$   
 TIMEPOINT:  $F(2,10) = 3.75$ ,  $p = .02$ ,  $\eta^2 = .12$   
 Interaction:  $F(4,10) = 0.51$ ,  $p = .80$ ,  $\eta^2 = .02$

**Dorsal STN bursts, locked to SMC bursts**

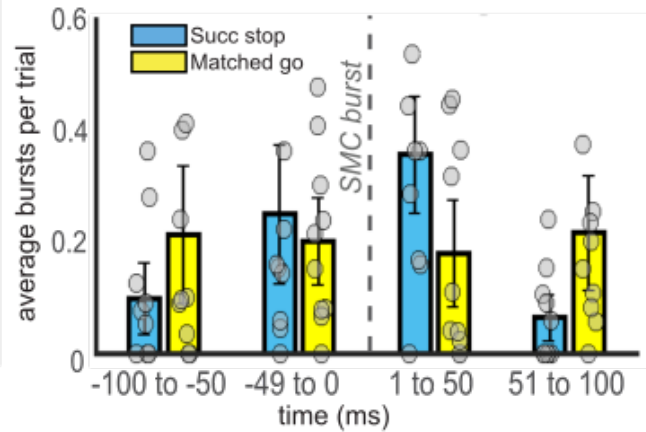

ANOVA for dorsal STN locked to SMC bursts:  
 TRIAL TYPE:  $F(2,10) = 0.14$ ,  $p = .87$ ,  $\eta^2 = .005$   
 TIMEPOINT:  $F(2,10) = 2.76$ ,  $p = .06$ ,  $\eta^2 = .07$   
 Interaction:  $F(4,10) = 2.49$ ,  $p = .03$ ,  $\eta^2 = .08$
