# Supplementary material for: Cortico-subcortical β burst dynamics underlying movement cancellation in humans
Source: eLife journal article supplement (doi:10.7554/elife.70270), 2021-12-07
Supplement: supp [file elife_poa_e70270_Supplementary_file_1.docx]

| Participant number | Diagnosis | Implantation site | Handedness | Symptom laterality | Symptom severity score |
| --- | --- | --- | --- | --- | --- |
| 1 | Parkinson’s disease | STN | R | - | - |
| 2 | both | STN/VIM | L | left | 49 |
| 3 | Parkinson’s disease | STN | R | bilateral | 38 |
| 4 | Essential tremor | VIM | R | - | - |
| 5 | Parkinson’s disease | STN | R | left | 33 |
| 6 | Essential tremor | VIM | R | right | 47 |
| 7 | Essential tremor | VIM | R | right | 59 |
| 8 | Parkinson’s disease | STN | R | right | 37 |
| 9 | Essential tremor | VIM | R | left | 43 |
| 10 | Essential tremor | VIM | R | right | - |
| 11 | Parkinson’s disease | STN | R | right | 34 |
| 12 | Parkinson’s disease | STN | R | right | - |
| 13 | Essential tremor | VIM | R | bilateral | 78 |
| 14 | Essential tremor | VIM | R | right | 85 |
| 15 | Essential tremor | VIM | R | left | - |
| 16 | Parkinson’s disease | STN | R | right | 31 |
| 17 | Essential tremor | VIM | R | bilateral | 69 |
| 18 | Parkinson’s disease | STN | R | right | - |
| 19 | Parkinson’s disease | STN | R | left | 29 |
| 20 | Essential tremor | VIM | R | right | 66 |
| 21 | Essential tremor | VIM | R | bilateral | 57 |

Table S1. Information about participant diagnoses, handedness, symptom laterality, and pre-operative symptom severity scores. For participants with Parkinson’s disease, scores shown are from the motor examination portion (i.e. total part III) of the Unified Parkinson’s disease rating scale (UPDRS). For essential tremor participants, scores are from the Fahn-Tolosa tremor scale. All Parkinson’s disease patients besides participant 2 were diagnosed with idiopathic Parkinson’s disease. Participant 2 had a diagnosis of both idiopathic Parkinson’s and essential tremor.
