# Supplementary figures and images for: Cortico-subcortical β burst dynamics underlying movement cancellation in humans
Source: eLife journal article supplement (doi:10.7554/elife.70270), 2021-12-07

# AVERAGED CORTICAL BETA POWER REBOUNDS AFTER RESPONSE

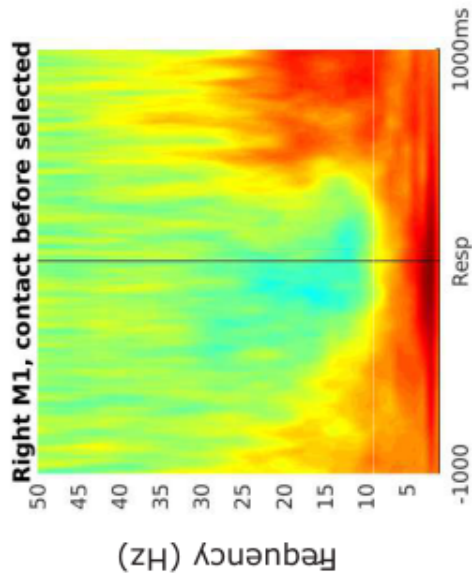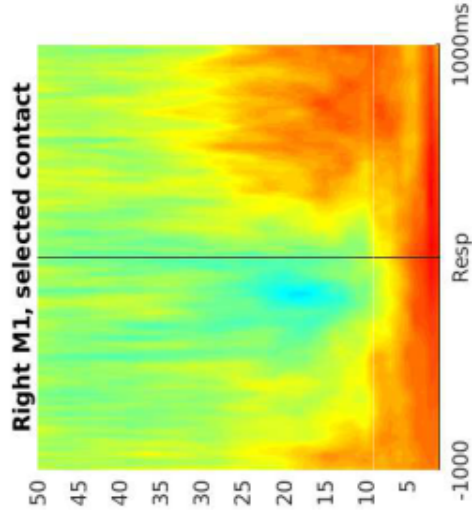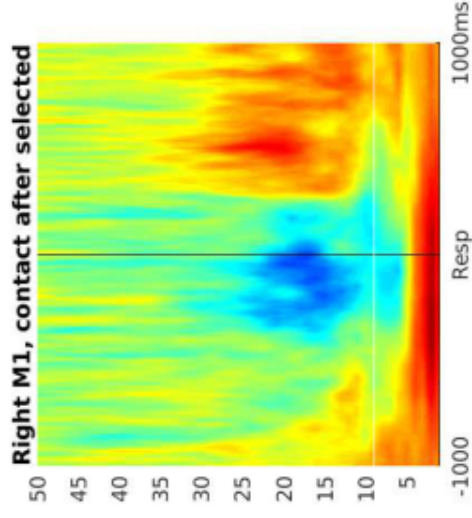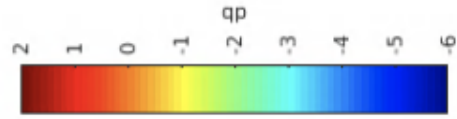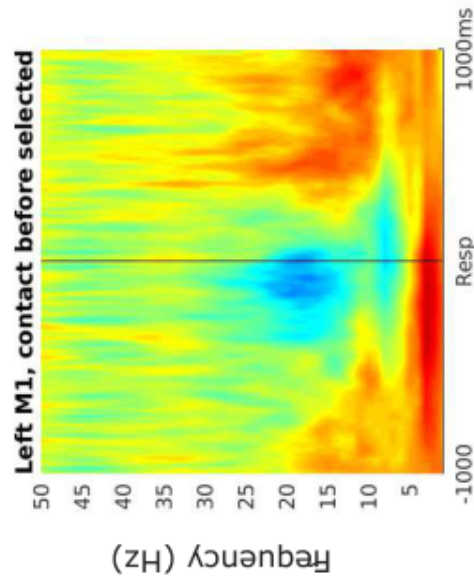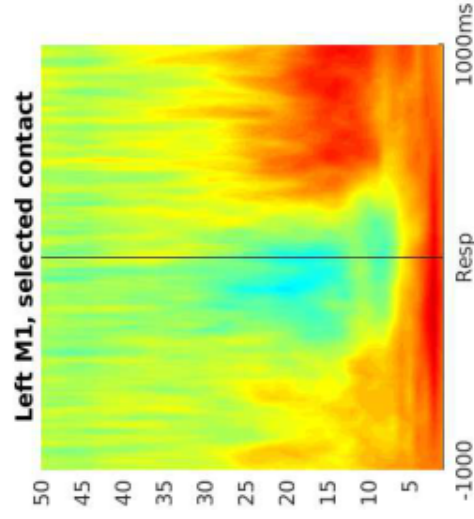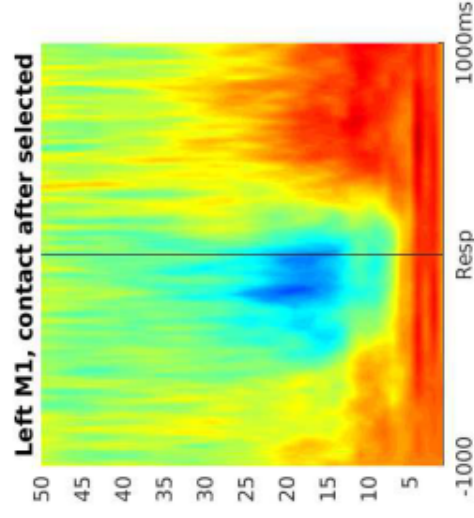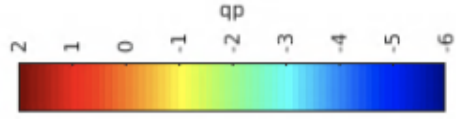

Supplement: supp [file elife_poa_e70270_Figure_1_figure_supplement_1.pdf › elife_poa_e70270_Figure_1_figure_supplement_1.pdf]

## AUDITORY STOP-SIGNAL TASK

### *Go trial (66%)*

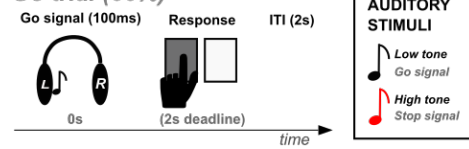

### *Stop trial (33%)*

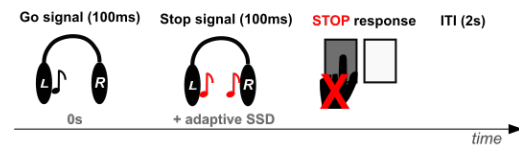

Supplement: supp [file elife_poa_e70270_Figure_3_figure_supplement_1.pdf › elife_poa_e70270_Figure_3_figure_supplement_1.pdf]

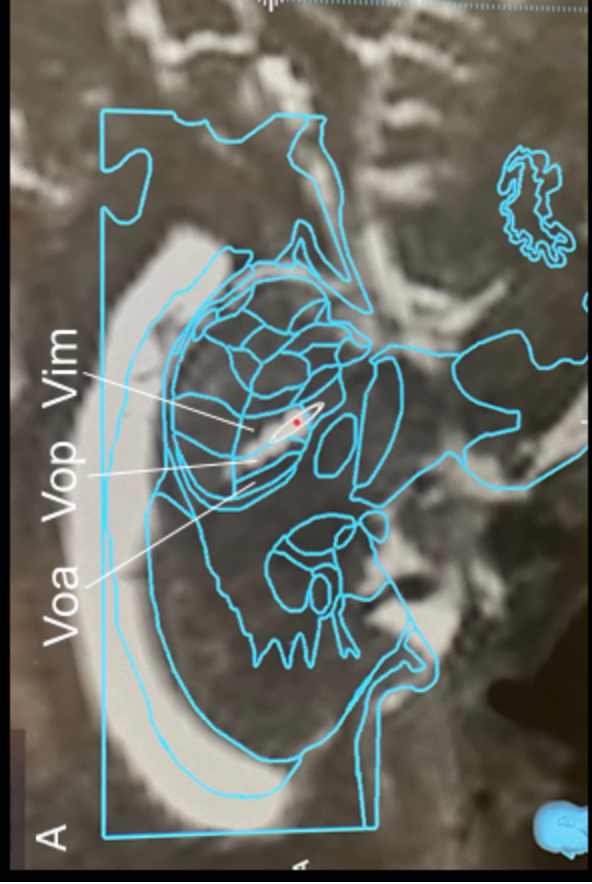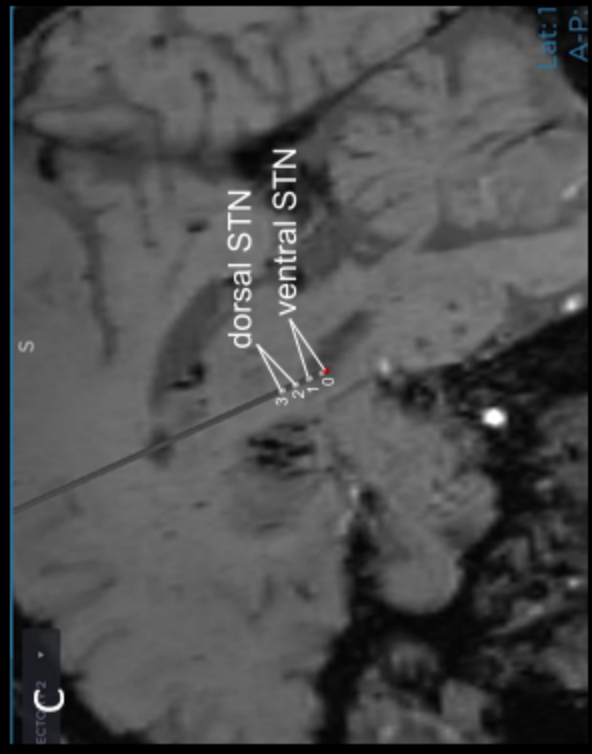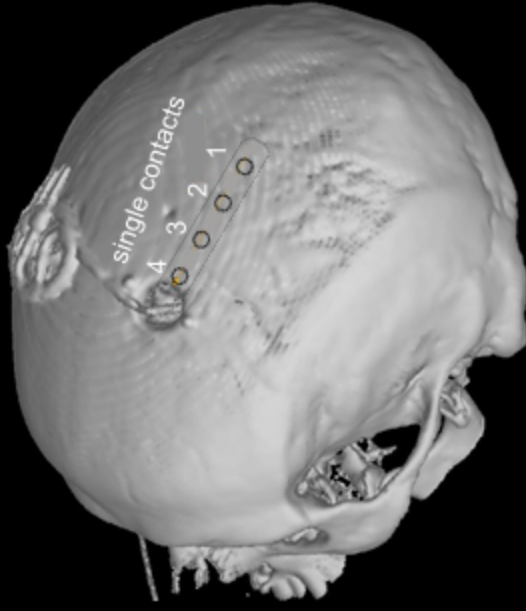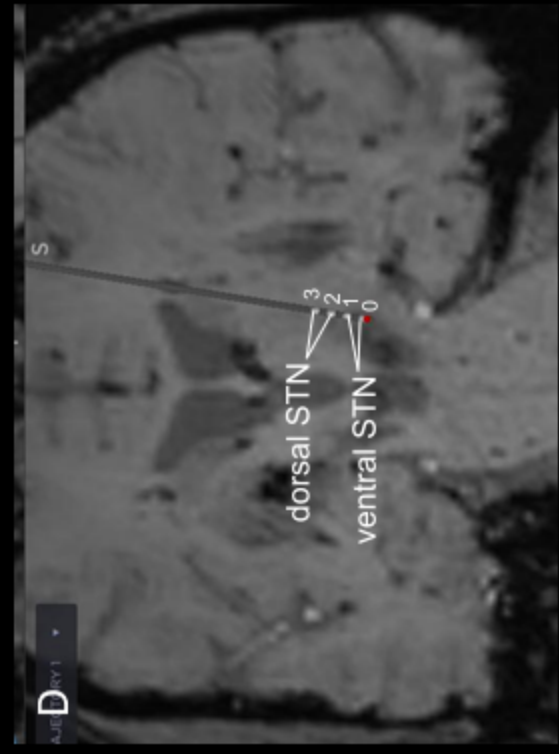

Supplement: supp [file elife_poa_e70270_Figure_3_figure_supplement_4.pdf › elife_poa_e70270_Figure_3_figure_supplement_4.pdf]
